# Supplementary material
Source: Elsevier journal article supplement (https://www.sciencedirect.com/science/article/pii/S0048712020300785)
Supplement: mmc1 [file S0048712020300785:mmc1.doc]

**MATERIAL Y MÉTODO**

Diseño del estudio

Estudio experimental prospectivo, aleatorizado, doble ciego desde enero de 2016 hasta septiembre de 2017 con número de registro ClinicalTrials.gov NCT03805113.

Población a estudio y selección de los pacientes

La población del estudio son los pacientes que acudieron al Servicio de Reumatología y Rehabilitación de nuestro centro afectados de AE de manos, entre enero de 2016 y mayo de 2017.

- Criterios de inclusión:
- Pacientes de ambos sexos mayores de 18 años con AE de manos sintomática de más de 6 meses de evolución, diagnosticada según los criterios diagnósticos descritos por Anandarajah en 201012,13 (erosiones a mínimo 2 articulaciones interfalángicas de las cuales, almenos una sea interfalángica distal, factor reumatoide negativo y/o anticuerpos anti-péptido citrulinado negativo, ausencia historia familiar y personal de artritis psoriásica, ausencia historia personal de gota y condrocalcinosis, presencia de erosiones subcondrales centrales, velocidad de sedimentación globular normal, proteína C reactiva normal)
- Pacientes con o sin tratamiento por su patología articular al momento de la inclusión.
- Pacientes que presentaban dolor crónico debido a su patología articular y que presentaban un valor en la escala EVA de dolor igual o superior a 4/10.
- Criterios de exclusión:
- Pacientes embarazadas
- Pacientes portadores/as de marcapasos o dispositivos similares
- Pacientes con antecedentes o diagnóstico de demencia o con funciones superiores no conservadas.
- Pacientes con antecedentes o diagnóstico de patología psiquiátrica que no permita la adherencia al tratamiento y seguimiento
- Pacientes con patología oncológica y/o infecciosa activa
- Pacientes que utilizasen MGT o tratamiento con parafina en el último año
- Pacientes que no cumplan con el tratamiento

Criterios de retirada de los pacientes

Los pacientes podían abandonar el estudio cuando lo deseasen, sin tener que dar ninguna explicación.

Los pacientes fueron retirados del estudio por los siguientes motivos:

- No desear continuar (retirada del consentimiento) por cualquier causa.
- Violación del protocolo con desviación significativa de los procedimientos específicos del estudio.
- Pérdida de seguimiento
- Aparición de enfermedad intercurrente clínicamente significativa que afectase la participación en el estudio.
- Que el investigador considerase beneficioso para el paciente su retirada del estudio.

Aleatorización y asignación de pacientes

Posteriormente a la selección de pacientes se asignaron al grupo control (GC) o grupo intervención (GI) mediante un muestreo de aleatorización simple realizado de forma automatizada mediante el programa Epidat vers 3.0. A medida que se incluían los pacientes se les asignaba un número que solo el fisioterapeuta podía asociar a la asignación previa automatizada al grupo intervención o control (**Figura 1**).

Variables del estudio

La variable principal del estudio fue:

- **Escala EVA de dolor**14,15**:** se pidió al paciente que valorase del 0 al 10 en una escala gráfica el grado de dolor que sufría, antes y después de la intervención. Se consideró como control del dolor aquellos pacientes con un EVA post tratamiento <6.

Las variables secundarias que se valoraron:

- **Escala DASH**16: el paciente respondió a los 30 ítems incluidos en el cuestionario otorgando una de las 5 respuestas posibles. Se calculó el valor final siguiendo la siguiente ecuación: DASH DISABILITY/SYMPTOM SCORE = [(suma de los valores de las respuestas) - 1]/n x 25, donde n es el número completo de respuestas. Se valoró el resultado según los resultados descritos por *Gummesson, Atroshi and Ekdah* en 200317; que correlacionaron la descripción de los síntomas de una serie de 109 pacientes intervenidos de la extremidad superior antes y entre los 6 y los 21 meses después de la intervención. Así, si referían “mucho mejor” o “mucho peor” la mediana del cambio en el valor final de DASH era de 19 (entre 15 y 23) puntos; refiriendo “un poco mejor” o “un poco peor” la mediana era de 10 (entre 7 y 14) puntos; y refiriendo “sin cambios” la mediana era de -3 (entre -3 y 3) puntos. Se valoró significativo un cambio en el valor final del DASH a partir de 7 puntos, tanto positiva como negativamente. Este cuestionario ha sido validado también para pacientes con artritis reumatoide.18
- La diferencia en la calidad de vida mediante los valores del **cuestionario SF-36**. Se trata de una batería de preguntas que se contestaron aproximadamente en 10 minutos con el fin de poder cuantificar y así posteriormente poder comparar el estado de salud de los pacientes incluidos en el estudio. El SF-36 utiliza 8 escalas para medir tres aspectos: estado funcional, bienestar y evaluación global de salud. Se obtienen 8 numeraciones de entre 0 y 100, indicando a más alta puntuación, mejor estado de salud. 19
- La rigidez mediante los valores del **Índice de Kapandji modificado**.20 Se trata de un índice de valoración de la movilidad de la mano. El resultado final se obtiene mediante la suma de los resultados de los 3 test que lo componen:
  - Test de oposición del pulgar. Consiste en tocar los pulpejos de los 4 dedos con el pulpejo del pulgar. La puntuación 0 equivale a imposible de conseguir; la 1, a tocar el lateral de la falange media del índice; la 2; a tocar el lateral de la falange distal del mismo dedo; la 3, a tocar el pulpejo del índice; la 4, a tocar el pulpejo del tercer dedo; la 5, a tocar el pulpejo del cuarto dedo; la 6, a tocar el pulpejo del quinto dedo; la 7, 8 y 9, a tocar cada uno de los pliegues de las falanges del quinto dedo respectivamente y el 10 cuando se consigue la oposición completamente.
  - Test de flexión de los dedos. Consiste en reseguir el pulgar con cada uno de los dedos, resultando 0 cuando no se llega al pulpejo del pulgar; 1, cuando se llega al pulpejo del pulgar; 2, cuando se llega al pliegue interfalángico del pulgar; 3, cuando se llega a la base del pulgar; 4, cuando se llega a la eminencia tenar; 5, cuando se llega a tocar la palma. El resultado va de 0 (imposible conseguir) a 20 (completamente conseguido).
  - Test de extensión de los dedos. Consiste en estirar la mano encima de una mesa y obtener el máximo contacto con la superficie de la mesa, siendo 0 cuando la parte dorsal de la falange media toca la mesa; 1, cuando lo hace la uña; 2, cuando lo hace solamente la punta de la uña; 3, cuando lo hace el pulpejo; 4, cuando lo hace la falange distal y 5, cuando todo el dedo está en contacto con la mesa. El resultado va de 0 (imposible conseguir) a 20 (completamente conseguido).
- La diferencia de fuerza mediante la prueba de dinamometría (JAMAR®) en ambas manos. El dinamómetro JAMAR® es un instrumento válido y fiable para medir la fuerza muscular de las manos.21 Para la realización correcta de esta prueba se coloca el paciente en sedestación con los codos flexionados a 90 grados sin apoyarlos y se le acerca el JAMAR® para poder realizar 3 determinaciones de fuerza con cada mano. El valor final se extrae de la media de los 3 valores de cada mano.

Se reportaron los eventos adversos y/o los efectos secundarios.
