# Supplementary material
Source: Elsevier journal article supplement (https://www.sciencedirect.com/science/article/pii/S0048712020300785)
Supplement: mmc2 [file S0048712020300785:mmc2.pdf]

## **Anexo 2. Consentimiento informado**

### **CONSENTIMIENTO INFORMADO PARA PARTICIPAR EN EL ESTUDIO**

#### **PROTECCIÓN DE DATOS DE CARÁCTER PERSONAL**

La totalidad de los datos de carácter personal que se obtengan durante su participación en el presente estudio, se mantendrá confidencial en la medida que la Ley Orgánica 15/1999, de 13 de diciembre, de Protección de Datos de Carácter Personal, y el Real Decreto 223/2004, de 6 de febrero por el que se regulan los ensayos clínicos con medicamentos, y demás legislación y normativa legalmente aplicables, así lo permitan.

A dichos efectos se pone en su conocimiento que:

- a) Sus datos personales relativos a su historial médico relacionados o que resulten del presente Estudio Clínico se incorporarán a un fichero de datos personales cuyo responsable es la Dra. Anna Boada Pladellorens con dirección en Plaça del Doctor Robert, 5. Terrassa C.P. 08221.
- b) Sus datos personales serán objeto de tratamiento con la única finalidad de realizar el Estudio Clínico que se describe en el presente documento de conformidad con lo establecido en la normativa vigente sobre Ensayos Clínicos.
- c) Sus datos podrán ser cedidos a aquellas terceras personas que conforme a lo establecido en la normativa vigente sobre Ensayos Clínicos deban participar en su realización, con sujeción a las obligaciones de confidencialidad establecidas en dicha normativa, así como en las establecidas en la Ley Orgánica de Protección de Datos.
- d) Usted podrá ejercitar sus derechos de acceso, rectificación y cancelación dirigiendo la correspondiente solicitud a la Dra. Anna Boada i Pladellorens con dirección en Plaça del Doctor Robert, 5. Terrassa C.P. 08221.
